# Supplementary material
Source: publisher figshare collection journal article supplement (https://gsapubs.figshare.com/articles/dataset/_/12977651)
Supplement: Supplementary file 1 [file 1]

## Sheet: Sheet1
TABLE S2. PYROXENES AND OLIVINE ANALYZED AT LEEDS
	Site 1438, Hole E	Depth [mbsf]	SiO2	TiO2	Al2O3	MgO	CaO	MnO	FeO	Na2O	Cr2O3	Mg#	Total*
Unit IV	57R 2W 39/41 cpx1	1376.9	52.0865	0.364238	2.79506	18.0512	18.1048	0.244257	7.87916	0.125667	0.322519	79.8366	100
	57R 2W 46/48 cpx1	1376.9	52.4625	0.208271	1.97343	16.4414	21.1754	0.200136	7.22725	0.138357	0.137466	79.7755	100
	57R 2W 46/48 cpx2	1376.9	51.8438	0.54051	2.09199	15.7568	19.1394	0.403552	9.94792	0.236227	-0.00236409	73.0602	100
	57R 2W 46/48 cpx3	1376.9	53.0638	0.333847	1.88682	15.6196	20.5542	0.223787	8.11661	0.125766	0.0578568	76.9432	100
	57R CC 17/23 cpx1	1376.9	52.6846	0.302631	1.03629	14.2172	20.8036	0.526568	10.1862	0.222968	0.00607381	70.2751	100
	58R 2W 43/45 cpx1	1386.2	52.4478	0.309344	1.3699	14.0657	19.7903	0.358978	11.4988	0.144	0.00312352	67.883	100
	58R CC 15/21 cpx1	1386.2	51.8561	0.341205	2.08145	14.0034	21.3439	0.481195	9.61436	0.253207	0.0257645	71.1901	100
	58R CC 15/21 cpx2	1386.2	51.8869	0.375235	1.61587	13.9353	19.9792	0.377494	11.6558	0.161038	0.0064526	67.3572	100
	61R CC 20/28 (1) cpx 1	1404.9	51.55	0.615818	2.96086	16.5415	20.9104	0.204497	6.89154	0.205653	0.119324	80.5965	100
	61R CC 20/28 (1) cpx 1	1404.9	51.5626	0.58823	2.95168	16.757	20.8124	0.187467	6.76036	0.243368	0.129498	81.1239	100
	61R CC 20/28 (1) cpx 1	1404.9	51.6308	0.624217	2.91991	16.5186	20.9916	0.19262	6.76059	0.216334	0.144858	80.8914	100
	61R CC 20/28 (1) cpx 3	1404.9	50.5501	0.834071	2.44548	13.2718	20.4956	0.521366	11.5025	0.382708	-0.00605082	66.2898	100
	61R CC 20/28 (1) cpx 3	1404.9	50.052	0.911717	2.90636	13.0788	20.4638	0.502668	11.6532	0.424623	0.00230188	65.7166	100
	61R CC 20/28 (1) cpx 3	1404.9	50.6346	0.833425	2.33693	13.2533	20.3415	0.54793	11.6972	0.354853	-0.00041716	65.8493	100
	61R CC 20/28 (1) cpx 4	1404.9	52.2493	0.378322	1.78531	15.9085	21.8133	0.215397	7.2556	0.312516	0.078096	79.1418	100
	61R CC 20/28 (1) cpx 4	1404.9	52.0734	0.410619	1.89116	15.8749	21.8898	0.191244	7.22185	0.351856	0.084335	79.2358	100
	61R CC 20/28 (1) cpx 4	1404.9	52.3873	0.362014	1.53677	15.9099	21.6504	0.251711	7.46646	0.360382	0.0739494	78.6	100
	61R CC 20/28 (1) cpx 4	1404.9	51.9134	0.432131	2.42041	15.7905	21.5962	0.196483	7.18083	0.296096	0.175019	79.2275	100
	61R CC 20/28 (1) cpx 5	1404.9	52.5357	0.255263	1.9551	17.7781	20.3886	0.171807	6.58457	0.211751	0.114119	82.4218	100
	61R CC 20/28 (1) cpx 5	1404.9	51.967	0.318598	2.38562	17.1865	20.2664	0.200741	7.41276	0.199916	0.0474146	80.0896	100
	61R CC 20/28 (1) cpx 6	1404.9	48.8864	0.923135	4.7953	13.7965	21.4443	0.243427	9.55815	0.346695	0.00802154	71.4958	100
	61R CC 20/28 (1) cpx 7	1404.9	52.4904	0.26647	1.74064	16.273	20.496	0.21419	8.14814	0.312923	0.0546442	77.617	100
	61R CC 20/28 (1) cpx 8	1404.9	50.7662	0.621965	3.10862	14.7883	21.1645	0.36516	8.86151	0.321192	-0.00215579	74.0634	100
	61R CC 20/28 (1) cpx 8	1404.9	50.4735	0.645011	3.57454	14.5925	21.1883	0.337633	8.8621	0.3093	0.0114075	73.8638	100
	61R CC 20/28 (1) cpx 9	1404.9	52.1714	0.352134	1.86699	15.979	20.652	0.219902	8.26473	0.423775	0.0652144	77.0427	100
	61R CC 20/28 (1) cpx 9	1404.9	52.1622	0.34169	1.87443	15.8441	20.7349	0.233122	8.2981	0.435	0.0708494	76.7947	100
	62R CC 21/24 cpx 1 Rim1	1410.3	53.2275	0.390907	1.81922	15.5561	19.823	0.273635	8.43256	0.367853	0.0300698	76.0979	100
	62R CC 21/24 cpx 1 Rim2	1410.3	52.9988	0.477647	1.78868	15.2997	20.6597	0.252813	8.14597	0.367728	0.00799408	76.4479	100
	62R CC 21/24 cpx 1 Core1	1410.3	53.0799	0.511893	1.9256	15.7027	20.4227	0.222953	7.74737	0.307935	0.0629868	77.83	100
	62R CC 21/24 cpx 1 Core2	1410.3	52.8241	0.487766	1.84555	15.3577	20.6882	0.242888	8.13375	0.359354	0.00796353	76.5636	100
	62R CC 21/24 cpx 2 Rim1	1410.3	52.5173	0.537269	3.11256	15.995	20.7634	0.183092	6.53427	0.245123	0.0610305	80.9269	100
	62R CC 21/24 cpx 2 Rim2	1410.3	53.2536	0.51871	2.68182	15.7765	20.6234	0.172573	6.45859	0.386801	0.0595079	80.9142	100
	62R CC 21/24 cpx 2 Core1	1410.3	52.5406	0.346921	3.45127	17.1616	20.1812	0.154519	5.5617	0.242247	0.302061	84.2515	100
	62R CC 21/24 cpx 2 Core2	1410.3	53.2078	0.325859	2.6298	16.9058	20.9955	0.134529	5.13802	0.258097	0.353762	85.1049	100
	63R 1W 17/19 cpx 1	1419.5	51.5772	0.231268	2.53682	15.2312	20.1712	0.295231	9.59848	0.248412	0.103606	73.2844	100
	63R 1W 17/19 cpx 2	1419.5	52.397	0.224538	1.9514	16.2824	20.1382	0.247784	8.44444	0.19608	0.0954259	76.9472	100
	63R 1W 17/19 cpx 3	1419.5	52.3563	0.26121	1.63079	15.1232	19.9096	0.325792	10.151	0.23387	0.00189226	72.0049	100
	63R 1W 17/19 cpx 5	1419.5	52.1881	0.190509	2.08164	15.9149	20.2478	0.245413	8.84168	0.256647	0.03196	75.733	100
	63R 1W 17/19 cpx 7	1419.5	49.6322	0.83736	4.74983	14.0475	22.5273	0.189504	7.69446	0.324111	-0.00559238	76.0486	100
	63R 1W 23/25 cpx 1	1419.5	52.1767	0.230636	1.88101	15.3656	20.4505	0.280882	9.32274	0.261493	0.0263022	74.0325	100
	63R 1W 23/25 cpx 2	1419.5	52.5921	0.363319	1.79634	15.5103	20.4822	0.286556	8.58185	0.359028	0.00820364	75.706	100
	63R 1W 23/25 cpx 3	1419.5	49.4716	0.680097	4.66354	14.4443	21.425	0.211438	8.7743	0.313376	0.00337765	74.1235	100
	63R 1W 23/25 cpx 4	1419.5	52.3286	0.222701	1.82752	15.421	20.4974	0.260364	9.18183	0.23321	0.0149404	74.4259	100
	63R 1W 23/25 cpx 5	1419.5	52.6538	0.169672	1.77278	16.1238	20.357	0.248761	8.31671	0.244192	0.100486	77.0338	100
	63R 1W 23/25 cpx 6	1419.5	52.4163	0.198247	1.7373	15.6127	20.5402	0.258655	8.98802	0.211821	0.0308441	75.0541	100
	63R 1W 23/25 cpx 7	1419.5	52.1473	0.202789	2.07252	15.7459	20.4582	0.258123	8.83132	0.237425	0.0431788	75.5311	100
	63R 1W 78/81 cpx 1	1419.5	52.1858	0.347444	1.68978	15.7894	20.4371	0.250306	8.92532	0.316741	0.0324402	75.4077	100
	63R 1W 78/81 cpx 2	1419.5	52.6465	0.239096	1.57594	15.8638	20.5625	0.282087	8.5804	0.222345	0.0169807	76.1305	100
	63R 1W 78/81 cpx 3	1419.5	50.5983	0.603649	4.61555	14.4354	22.495	0.157337	6.80998	0.126816	0.149856	78.6877	100
	63R 1W 134/136 cpx 1	1419.5	51.7376	0.350461	2.9842	16.2976	22.9797	0.115054	4.73864	0.173123	0.621718	85.6806	100
	63R 1W 134/136 cpx 1	1419.5	51.5182	0.366785	3.24357	16.2827	23.0474	0.10526	4.78648	0.177693	0.469784	85.5736	100
	63R 1W 134/136 cpx 1	1419.5	51.6304	0.34714	2.9887	16.4357	23.1417	0.107792	4.78011	0.177004	0.391588	85.6982	100
	63R 1W 134/136 cpx 1	1419.5	51.0058	0.395153	3.4803	16.3699	23.0699	0.120138	4.88494	0.176843	0.496421	85.355	100
	63R 1W 134/136 cpx 2	1419.5	53.1377	0.130488	0.871237	15.9245	21.7358	0.26367	7.68262	0.239663	0.0143471	78.1216	100
	63R 1W 134/136 cpx 2	1419.5	52.9136	0.14643	1.08675	15.739	21.9554	0.265696	7.58081	0.302368	0.0143872	78.1372	100
	63R 1W 134/136 cpx 2	1419.5	53.152	0.111864	0.816892	16.0009	21.761	0.273674	7.6433	0.22676	0.0139598	78.2659	100
	63R 1W 134/136 cpx 2	1419.5	53.239	0.127484	0.883578	15.8983	21.9101	0.239753	7.44998	0.225573	0.0230296	78.6502	100
	63R 1W 134/136 cpx 3	1419.5	51.534	0.391819	2.74158	16.6507	22.3662	0.158763	5.62674	0.217198	0.296061	83.6824	100
	63R 1W 134/136 cpx 3	1419.5	51.3109	0.39222	2.80902	16.7326	22.4507	0.137882	5.67118	0.197422	0.289679	83.6946	100
	63R 1W 134/136 cpx 3	1419.5	51.9388	0.373424	2.48077	16.7735	22.1833	0.148935	5.67834	0.191715	0.221976	83.6848	100
	63R 1W 134/136 cpx 3	1419.5	51.7633	0.394126	2.72241	16.5279	22.2656	0.157467	5.67202	0.204415	0.285975	83.4769	100
	63R 1W 134/136 cpx 4	1419.5	50.6859	0.501739	3.88887	15.8557	22.613	0.146798	5.777	0.20398	0.311652	82.6679	100
	63R 1W 134/136 cpx 4	1419.5	50.9188	0.44794	3.66172	15.9771	22.7677	0.134037	5.54786	0.21686	0.310129	83.3634	100
	63R 1W 134/136 cpx 4	1419.5	50.9969	0.433493	3.5871	15.981	22.9744	0.145339	5.39774	0.164982	0.310623	83.7066	100
	63R 1W 134/136 cpx 4	1419.5	50.6325	0.501037	3.92576	15.8853	22.5853	0.150143	5.82897	0.193446	0.284773	82.5612	100
	63R 1W 134/136 cpx 5	1419.5	51.0217	0.535131	3.29308	16.102	22.0086	0.154513	6.47607	0.223276	0.167873	81.2294	100
	63R 1W 134/136 cpx 5	1419.5	51.2201	0.459781	3.31593	16.1114	22.4677	0.153552	5.93047	0.159705	0.173898	82.5141	100
	63R 1W 134/136 cpx 5	1419.5	50.9299	0.429009	3.42297	16.1265	22.7612	0.128982	5.77692	0.194579	0.21546	82.9525	100
	63R 1W 134/136 cpx 5	1419.5	51.3362	0.42887	3.41493	15.9123	22.6235	0.150021	5.74575	0.176153	0.201355	82.7865	100
	63R 1W 134/136 cpx 6	1419.5	51.3611	0.448543	3.31461	16.0541	22.6082	0.131206	5.45066	0.182366	0.442191	83.6741	100
	63R 1W 134/136 cpx 6	1419.5	51.4983	0.431654	3.17235	16.2428	22.6232	0.12489	5.34389	0.158015	0.40139	84.1087	100
	64R 4W 66/72 cpx 1	1428.7	52.2119	0.475872	1.7322	15.6432	19.975	0.508689	9.12215	0.332282	0.00397829	74.3154	100
	64R 4W 66/72 cpx 1	1428.7	52.1228	0.499165	1.85956	15.4377	19.925	0.538816	9.2871	0.339768	-0.0113011	73.6746	100
	64R 4W 66/72 cpx 1	1428.7	52.2139	0.488768	1.75784	15.5128	19.4484	0.53036	9.72092	0.341221	-0.0127865	72.9411	100
	64R 4W 66/72 cpx 1	1428.7	52.1683	0.511768	1.77481	15.4366	19.7017	0.501095	9.5749	0.314175	0.0186106	73.1842	100
	66R CC 29/32 cpx 1	1447.1	51.8822	0.422363	2.42716	16.3287	19.8461	0.289816	8.60616	0.186035	0.00125678	76.5836	100
	66R CC 29/32 cpx 1	1447.1	47.755	0.973041	5.93813	13.7935	21.0804	0.249288	9.89413	0.315693	-0.00992724	70.7877	100
	66R CC 29/32 cpx 1	1447.1	49.2296	0.758276	4.87215	14.3017	21.4828	0.20716	8.85602	0.260043	0.00908766	73.7671	100
	66R CC 29/32 cpx 2	1447.1	52.5429	0.325921	1.63274	15.1524	20.8765	0.404099	8.66931	0.384024	0.00714597	74.8434	100
	66R CC 29/32 cpx 2	1447.1	52.4664	0.345857	1.57783	15.1782	21.1715	0.374997	8.50935	0.372104	-0.000626718	75.27	100
	66R CC 29/32 cpx 2	1447.1	51.9835	0.417296	2.23101	14.6162	21.0594	0.378089	8.88634	0.416241	0.00924609	73.7587	100
	66R CC 29/32 cpx 2	1447.1	52.2779	0.33477	1.66829	15.0695	21.1991	0.382174	8.62338	0.42943	0.00399643	74.8819	100
	66R CC 29/32 cpx 3	1447.1	52.2448	0.360735	1.58539	14.9756	21.4658	0.448511	8.52304	0.390284	-0.00751541	74.8337	100
	66R CC 29/32 cpx 3	1447.1	52.6673	0.304897	1.33906	14.9301	21.6879	0.461798	8.21116	0.394972	0.00189415	75.4087	100
	66R CC 29/32 cpx 3	1447.1	52.4938	0.351505	1.51128	15.0149	21.5842	0.449049	8.21461	0.371477	-0.00104976	75.5336	100
	66R CC 29/32 cpx 3	1447.1	52.6465	0.319641	1.35392	15.0807	21.4835	0.460886	8.25253	0.398757	-0.0109286	75.5084	100
	67R CC 14/17 cpx 1	1451.7	51.0833	0.675639	2.58801	15.6948	18.5646	0.394651	10.6899	0.315392	-0.00687299	71.6132	100
	67R CC 14/17 cpx 1	1451.7	51.1993	0.625631	2.6075	15.8651	18.1214	0.417542	10.8758	0.286797	-0.000860066	71.4527	100
	67R CC 14/17 cpx 1	1451.7	51.2128	0.62231	2.52149	15.5915	18.8862	0.398601	10.4087	0.331696	0.0167426	71.9921	100
	67R CC 14/17 cpx 1	1451.7	51.0252	0.685548	2.59398	15.6138	18.7982	0.377302	10.5807	0.316841	0.00188251	71.7417	100
Unit 1	69R CC 28/32 cpx 1 Rim1	1460.9	54.4329	0.197799	1.23901	19.1494	16.7246	0.238965	7.84168	0.129523	0.025	80.8525	100
	69R CC 28/32 cpx 1 Rim2	1460.9	54.4031	0.247525	1.22354	19.0091	16.6636	0.247525	8.0355	0.124769	0.029	80.3508	100
	69R CC 28/32 cpx 1 Core1	1460.9	54.3153	0.224667	1.40417	19.1007	18.3896	0.187557	6.15027	0.124369	0.063	84.3017	100
	69R CC 28/32 cpx 1 Core2	1460.9	54.3005	0.287469	1.41825	18.9277	18.7398	0.18394	5.8519	0.156801	0.078	84.8201	100
	69R CC 28/32 cpx 2 Core1	1460.9	52.4367	0.440931	3.15683	16.7996	20.7288	0.143629	5.91591	0.149655	0.158	83.1662	100
	69R CC 28/32 cpx 2 Core2	1460.9	52.8622	0.361733	2.95315	17.8194	18.9638	0.176847	6.42678	0.196943	0.166	82.7835	100
	69R CC 28/32 cpx 4 Rim1	1460.9	54.6629	0.185082	1.50255	18.5968	19.0983	0.180107	5.45196	0.135329	0.133	85.4723	100
	69R CC 28/32 cpx 4 Core1	1460.9	53.9878	0.186997	1.46481	18.6595	19.2436	0.194034	5.95072	0.119638	0.128	84.4012	100
	69R CC 28/32 cpx 4 Core2	1460.9	54.3728	0.195864	1.41725	18.4102	19.2469	0.17678	5.90906	0.123545	0.134	84.3513	100
	69R CC 28/32 cpx 3 Rim1	1460.9	54.363	0.348597	2.55201	16.0868	16.3347	0.271019	9.37887	0.632714	0.012	74.8143	100
	69R CC 28/32 cpx 3 Rim2	1460.9	54.0344	0.268458	1.43177	18.2843	18.8202	0.214163	6.82204	0.098535	0.021	82.2389	100
	69R CC 28/32 cpx 3 Core1	1460.9	54.1644	0.209547	1.53501	18.3228	20.0654	0.160419	5.19656	0.137359	0.16	85.9047	100
	69R CC 28/32 cpx 3 Core2	1460.9	53.8857	0.172943	1.81992	17.9991	20.6063	0.163893	4.7519	0.159871	0.416	86.7091	100
	69R CC 28/32 cpx 5	1460.9	52.0001	0.57516	2.9469	16.8658	18.5767	0.230668	8.61938	0.171508	0.00217165	77.2515	100
	69R CC 28/32 cpx 5	1460.9	51.9348	0.520543	3.05553	17.3149	18.9385	0.202554	7.82241	0.163808	0.0379097	79.3594	100
	69R CC 28/32 cpx 5	1460.9	51.6033	0.672577	3.21003	16.5716	19.2288	0.205243	8.30533	0.192487	0.0147156	77.6279	100
	69R CC 28/32 cpx 5	1460.9	52.1631	0.54224	2.87363	18.0908	17.1028	0.25729	8.77219	0.180158	0.0142222	78.1184	100
	69R CC 28/32 cpx 6	1460.9	52.5406	0.378796	2.93313	18.1235	19.5941	0.156436	5.84593	0.152617	0.272054	84.3269	100
	69R CC 28/32 cpx 6	1460.9	52.6907	0.339989	2.93389	17.8846	19.7258	0.178063	5.73274	0.18696	0.31615	84.3541	100
	69R CC 28/32 cpx 6	1460.9	52.6908	0.38338	2.77231	18.2016	18.9563	0.191237	6.54828	0.188307	0.049516	82.7954	100
	69R CC 28/32 cpx 7	1460.9	51.383	0.557248	3.05077	16.8405	18.8357	0.236576	8.90166	0.165628	0.0167128	76.6566	100
	69R CC 28/32 cpx 7	1460.9	51.8579	0.594778	3.04059	16.8202	18.768	0.262438	8.43926	0.187014	0.00978468	77.4991	100
	69R CC 28/32 cpx 7	1460.9	52.0338	0.543582	3.07621	16.5546	18.9165	0.236671	8.45012	0.183877	0.0010737	77.2512	100
	69R CC 28/32 cpx 7	1460.9	51.7566	0.642508	3.09073	16.4039	18.4062	0.252781	9.25051	0.183147	-0.0100281	75.4652	100
	69R CC 28/32 cpx 8	1460.9	53.8788	0.235065	1.44073	18.3605	19.9997	0.172115	5.71754	0.126329	0.0603824	84.7441	100
	69R CC 28/32 cpx 8	1460.9	53.9423	0.295792	1.43534	18.0484	19.5789	0.190063	6.37417	0.104017	0.029479	83.0488	100
	69R CC 28/32 cpx 8	1460.9	53.9773	0.239138	1.46582	18.3253	19.933	0.156933	5.69613	0.139319	0.0557016	84.8001	100
	69R CC 28/32 cpx 8	1460.9	54.1129	0.259032	1.67589	17.9555	20.5794	0.189269	5.23383	0.11972	-0.147478	85.5056	100
	69R CC 28/32 cpx 9	1460.9	53.6362	0.288527	1.37476	18.3063	20.0967	0.159645	5.91223	0.140474	0.0788444	84.3074	100
	69R CC 28/32 cpx 9	1460.9	53.7382	0.242862	1.38978	18.6528	18.7174	0.22421	6.87196	0.107238	0.0399697	82.4056	100
	69R CC 28/32 cpx 9	1460.9	52.5603	0.380368	2.96188	16.8346	21.3774	0.142897	5.10583	0.150274	0.480459	85.1086	100
	69R CC 28/32 cpx 9	1460.9	52.6442	0.342946	2.65716	18.108	19.8408	0.161568	5.75306	0.169715	0.313366	84.5092	100
	69R CC 28/32 cpx 10	1460.9	53.9085	0.259134	1.48802	18.2702	19.886	0.187329	5.71221	0.108233	0.163121	84.658	100
	69R CC 28/32 cpx 10	1460.9	52.3748	0.451873	2.92185	17.0367	20.9968	0.140698	5.59841	0.158318	0.309785	84.1014	100
	69R CC 28/32 cpx 10	1460.9	52.4148	0.51352	2.95479	16.4723	20.9496	0.189091	6.26975	0.174525	0.0614325	81.9638	100
	69R CC 28/32 cpx 10	1460.9	53.2525	0.235097	1.48475	18.5561	20.1208	0.195092	5.89709	0.116949	0.130455	84.4411	100
	69R CC 28/32 cpx 11	1460.9	52.2511	0.410087	2.89903	17.3345	20.7261	0.157917	5.48228	0.181168	0.546741	84.5595	100
	69R CC 28/32 cpx 11	1460.9	53.3299	0.272905	1.64503	18.4685	20.3317	0.182622	5.34988	0.096621	0.314435	85.6072	100
	69R CC 28/32 cpx 11	1460.9	52.4141	0.38078	2.90741	16.9946	21.0841	0.149646	5.45858	0.197193	0.415383	84.3745	100
	69R CC 28/32 cpx 11	1460.9	52.1656	0.44624	2.97477	17.0681	20.9803	0.166741	5.82456	0.187936	0.172689	83.5427	100
	69R CC 28/32 cpx 12	1460.9	51.6638	0.466386	3.63037	17.1291	20.7645	0.140938	5.47842	0.121847	0.602441	84.4523	100
	69R CC 28/32 cpx 12	1460.9	52.4971	0.352654	3.21036	17.4295	20.3048	0.150299	5.15615	0.165258	0.821772	85.4074	100
	69R CC 28/32 cpx 12	1460.9	51.7953	0.479525	3.70676	16.8443	20.8194	0.129325	5.4085	0.188103	0.60248	84.4244	100
	69R CC 28/32 cpx 12	1460.9	52.4855	0.367525	2.88536	17.0902	21.165	0.17155	5.26093	0.179597	0.386463	84.861	100
	69R CC 28/32 cpx 13	1460.9	53.6852	0.249454	1.53062	18.3414	20.2885	0.147085	5.37603	0.156427	0.209695	85.5439	100
	69R CC 28/32 cpx 13	1460.9	53.934	0.28387	1.47096	18.4637	19.7515	0.194536	5.66584	0.116758	0.11234	84.8798	100
	69R CC 28/32 cpx 13	1460.9	53.9815	0.220985	1.46581	18.2854	20.223	0.157409	5.36096	0.111165	0.179677	85.5164	100
	69R CC 28/32 cpx 13	1460.9	53.4206	0.258267	1.52417	18.4723	20.4827	0.185302	5.3085	0.15954	0.176322	85.6959	100
	69R CC 28/32 cpx 14	1460.9	52.6472	0.350218	2.80877	17.0876	21.1269	0.133214	5.06946	0.194347	0.574814	85.4071	100
	69R CC 28/32 cpx 14	1460.9	52.7501	0.339623	2.71095	17.0465	21.2072	0.14879	5.02827	0.163886	0.586532	85.438	100
	69R CC 28/32 cpx 14	1460.9	51.8472	0.403572	3.74318	16.7658	20.7429	0.154016	5.47762	0.165186	0.694829	84.1393	100
	69R CC 28/32 cpx 14	1460.9	52.1511	0.372906	3.16053	17.0428	21.0622	0.13581	4.90347	0.206845	0.952478	85.768	100
	69R CC 28/32 cpx 15	1460.9	52.5743	0.351779	2.90205	16.9353	21.4825	0.145168	4.67216	0.200295	0.721339	86.2336	100
	69R CC 28/32 cpx 15	1460.9	53.7549	0.223038	1.55831	18.2131	20.6249	0.154954	5.04355	0.173026	0.248317	86.1931	100
	69R CC 28/32 cpx 15	1460.9	53.1971	0.289471	1.51056	18.1279	20.7879	0.156651	5.70799	0.153765	0.059614	84.6343	100
	69R CC 28/32 cpx 15	1460.9	52.0326	0.395415	3.02397	16.8979	21.7437	0.143426	5.36417	0.192051	0.198364	84.5374	100
	69R CC 28/32 cpx 16	1460.9	53.9779	0.255514	1.39063	18.7571	18.9023	0.186433	6.34683	0.102037	0.0706544	83.6489	100
	69R CC 28/32 cpx 16	1460.9	54.0711	0.227593	1.42289	18.7339	18.9783	0.204823	6.14924	0.149337	0.0526683	84.0085	100
	69R CC 28/32 cpx 16	1460.9	53.527	0.257406	1.39843	18.7583	19.5967	0.196118	6.10302	0.116892	0.0404999	84.1424	100
	69R CC 28/32 cpx 16	1460.9	52.683	0.39999	2.51674	17.4281	20.196	0.160088	6.37965	0.167378	0.0535293	82.6053	100
	69R CC 28/32 cpx 17	1460.9	52.1701	0.436157	3.12442	17.0053	20.2462	0.15783	6.61785	0.201087	0.0319232	81.7265	100
	69R CC 28/32 cpx 17	1460.9	52.0555	0.458353	3.1597	17.1106	19.8427	0.194158	7.01212	0.16004	0.000679193	80.8832	100
	69R CC 28/32 cpx 17	1460.9	51.5842	0.48666	3.17959	16.9423	19.6938	0.231362	7.68427	0.193087	-0.00264598	79.2265	100
	69R CC 28/32 cpx 17	1460.9	52.3751	0.406791	3.1183	16.8739	20.2194	0.171768	6.62976	0.143227	0.0552708	81.5528	100
	69R CC 28/32 cpx 18	1460.9	52.6793	0.425802	2.71687	17.1697	20.7443	0.180093	5.81621	0.169397	0.0817245	83.6123	100
	69R CC 28/32 cpx 18	1460.9	52.2462	0.429156	2.83874	17.0692	20.7458	0.18321	6.24496	0.16194	0.0727936	82.5528	100
	69R CC 28/32 cpx 18	1460.9	52.8152	0.389195	2.77473	17.207	20.5026	0.156067	5.88287	0.163977	0.111285	83.5455	100
	69R CC 28/32 cpx 18	1460.9	52.5629	0.468696	2.74106	17.2224	20.6459	0.158339	5.88771	0.198124	0.104502	83.5416	100
	69R CC 28/32 cpx 19	1460.9	52.5153	0.292655	2.89055	16.9101	21.5571	0.130795	4.50086	0.212956	0.988111	86.6767	100
	69R CC 28/32 cpx 19	1460.9	53.2214	0.238742	2.13693	17.5574	21.5158	0.137915	4.36047	0.155144	0.6613	87.4287	100
	69R CC 28/32 cpx 19	1460.9	54.0012	0.285533	1.57584	17.9827	20.5441	0.153033	5.13832	0.143944	0.164165	85.8271	100
	69R CC 28/32 cpx 19	1460.9	52.2033	0.285072	2.98173	16.9807	21.7827	0.133827	4.42391	0.150331	1.04045	86.9087	100
	Sample ID Site 1438, Hole E	Depth (mbsf)	SiO2	TiO2	Al2O3	MgO	CaO	MnO	FeO	Na2O	Cr2O3	K2O	F	Cl	Mg#	Total*
	55R 3W 77-79 olivine 1 c1	1360	41.77	0.01	0.03	48.81	0.07	0.13	9.25	0	0	0.01	0	0	90.3897	100
	55R 3W 77-79 olivine 1 c2	1360	40.59	0	0.02	48.9	0.07	0.14	9.1	0	0.02	0	0	0	90.5465	100
	55R 3W 77-79 olivine 1 c3	1360	40.5	0.01	0.01	47.84	0.07	0.12	9.25	0	0.07	0.01	0	0	90.2139	100
	55R 3W 77-79 olivine 1 c4	1360	39.72	0.01	0.02	48	0.07	0.12	9.26	0	0	0.01	0.04	0	90.2338	100
	55R 3W 77-79 olivine 1 r1	1360	39.63	0	0.03	48.13	0.06	0.13	9.22	0	0.05	0.01	0	0	90.2956	100
	55R 3W 77-79 olivine 1 r2	1360	39.08	0.01	0.02	47.76	0.08	0.11	9.2	0.01	0	0	0	0	90.2469	100
	55R 3W 77-79 olivine 1 r3	1360	40.06	0.01	0.02	48.02	0.09	0.12	9.21	0.02	0.06	0.01	0	0	90.2851	100
	55R 3W 77-79 olivine 1 r4	1360	41.6	0.01	0	48.25	0.08	0.13	9.08	0	0.06	0	0	0.01	90.4504	100
	55R 3W 77-79 olivine 1 r5	1360	41.06	0.01	0	48.59	0.08	0.14	9.13	0.02	0	0	0.02	0.02	90.4636	100
	61R 3W 49-51 olivine 1 c1	1405	35.41	0.02	0.04	48.1	0.22	0.19	11.3	0	0.17	0.01	0.11	0	88.3547	100
	61R 3W 49-51 olivine 1 c2	1405	37.45	0.02	0.05	48.99	0.22	0.2	11.16	0.01	0.01	0.01	0	0	88.6679	100
	61R 3W 49-51 olivine 1 c3	1405	39.44	0	0.04	49.7	0.2	0.2	11.27	0.01	0.05	0	0	0	88.7139	100
	61R 3W 49-51 olivine 1 c4	1405	38.42	0.02	0.07	47.4	0.21	0.19	11.44	0	0.03	0.01	0	0	88.0743	100
	61R 3W 49-51 olivine 1 c5	1405	38.05	0.01	0.07	47.26	0.22	0.2	11.53	0.02	0.01	0.01	0	0	87.9605	100
	STANDARDS	SiO2	TiO2	Al2O3	FeO	MnO	MgO	CaO	Na2O	K2O	Cr2O3	TOTAL
	GEO2 Diopside	55.3779	0.035923	-0.03096	0.812941	0.072406	18.1426	25.6749	0.058377	-0.00255	-0.00497	100.137
	GEO2 Diopside	55.6481	0.025962	-0.02397	0.72314	0.073759	18.2993	25.624	0.041114	-0.00094	0.001295	100.412
	GEO2 Diopside	55.5019	0.035734	-0.0418	0.762413	0.069167	18.2588	25.5993	0.008299	-0.00197	0.017466	100.209
	GEO2 Diopside	55.3575	0.030521	-0.04711	0.803649	0.074554	18.0995	25.6358	0.066243	-0.00275	-0.00647	100.012
	GEO2 Diopside	55.3085	0.032525	-0.00016	0.704611	0.07354	18.2906	25.5191	0.053517	0.00159	0.002156	99.9859
	Natural River Diopside	55.8354	-0.00385	0.031909	0.200603	0.03511	18.2747	25.8916	0.070368	-0.00242	0.004104	100.338
	Natural River Diopside	55.7607	0.00477	0.01084	0.206775	0.019138	18.34	25.9655	0.03533	0.000148	0.019638	100.363
	Natural River Diopside	55.5678	0.005324	0.01612	0.187861	0.023017	18.3095	26.0079	0.024557	0.001795	-0.02093	100.123
	Natural River Diopside	55.5833	0.002807	0.010631	0.214333	0.039408	18.3996	26.014	0.064133	0.00387	0.006466	100.339
	Natural River Diopside	55.5547	-0.00096	-0.01084	0.208034	0.032711	18.3179	26.0748	0.03987	-0.00079	-0.00885	100.207
	Olivine Fo90	40.6534	-0.00151	-0.01244	9.56693	0.144408	48.7409	0.094445	-0.01662	-0.00367	0.00202	99.1679
	Olivine Fo90	40.7261	0.00503	-0.0214	9.56552	0.136098	48.7143	0.094301	-0.01516	-0.00338	0.027221	99.2286
	Olivine Fo90	40.6177	0.005029	-0.02582	9.53356	0.147956	48.7109	0.099629	-0.03464	0.000758	0.008468	99.0635
	Olivine Fo90	40.6983	0.009279	-0.05034	9.53345	0.151938	48.669	0.094323	0.000143	-0.00385	0.008871	99.111
	Olivine Fo90	40.6012	0.002669	-0.02153	9.56888	0.145484	48.7919	0.090821	0.004921	-0.00033	0.022986	99.207
	Olivine Fo90	40.6774	0.00631	-0.02096	9.59633	0.146346	48.9734	0.097081	-0.0328	-0.00152	0.012509	99.4542
	Olivine Fo90	40.914	-0.00461	-0.02388	9.64457	0.149945	48.8724	0.099721	-0.01308	-0.00145	0.00565	99.6433
	Hornblende	39.9089	4.83348	13.7317	10.3858	0.073361	12.5536	10.05	2.74768	2.07365	-0.00211	96.356
	Hornblende	39.8374	4.83733	13.7605	10.3873	0.091903	12.5684	10.0609	2.71449	2.09529	0.013741	96.3672
	Hornblende	40.0851	4.88592	13.701	10.4232	0.093771	12.533	10.0716	2.70048	2.08777	-0.00471	96.5771
	Hornblende	39.6108	4.86316	13.758	10.3772	0.094732	12.4397	10.0512	2.92054	2.1029	-0.0043	96.2139
	Hornblende	39.9698	4.84044	13.6315	10.3917	0.079006	12.6355	10.0555	2.77053	2.08744	0.005125	96.4666
	Augite Kakanui	50.033	0.844442	8.03063	6.268	0.148177	16.0445	16.1325	1.35	0.001298	0.129476	98.982
	Augite Kakanui	50.1628	0.822831	8.05109	6.21507	0.122991	16.1563	16.0876	1.37376	0.008967	0.140006	99.1414
	Augite Kakanui	50.1334	0.831709	8.05907	6.22919	0.138443	16.0278	16.122	1.35129	-0.00301	0.129728	99.0196
	Augite Kakanui	49.9043	0.83321	8.07831	6.27235	0.125522	16.2067	16.1249	1.37709	-0.00161	0.13972	99.0605
	Augite Kakanui	49.6967	0.828661	8.08028	6.22999	0.13526	16.1524	16.1093	1.33646	0.003379	0.135907	98.7082
	Augite Kakanui	50.0513	0.840023	8.08418	6.24489	0.139811	16.1023	16.1009	1.36615	0.00074	0.123508	99.0538
